# Supplementary material
Source: Springer Nature journal article supplement (https://www.springermedizin.de/resource/supplementary/13256_2013_2648_MOESM2_ESM.pdf/9650192)

**A**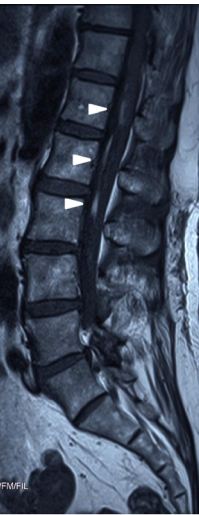**B**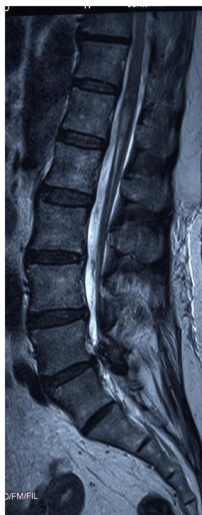**C**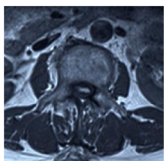**D**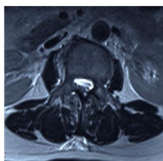

Supplement: MOESM2 [file 9650192]
